# Supplementary material for: Homoleptic tetranuclear osmium carbonyls: from the rhombus via the butterfly to the tetrahedron
Source: Royal Society of Chemistry journal article supplement (doi:10.1039/b716392d), 2008-01-01
Supplement: b716392d.pdf [file b716392d.pdf]

# Homoleptic Tetranuclear Osmium Carbonyls: From the Rhombus via the Butterfly to the Tetrahedron

Bing Xu,<sup>a</sup> Qian-Shu Li,<sup>\*a,b</sup> Yaoming Xie,<sup>c</sup> R. Bruce King,<sup>\*c</sup> and Henry F. Schaefer III<sup>c</sup>

<sup>a</sup>*Institute of Chemical Physics, Beijing Institute of Technology, Beijing 100081, China*

<sup>b</sup>*Center for Computational Quantum Chemistry, South China Normal University, Guangzhou, 510631 China*

<sup>c</sup>*Department of Chemistry and Center for Computational Chemistry  
University of Georgia, Athens, Georgia 30602, USA*

## Supporting Information

**Figures S1 to S7 and Tables S1 to S18:** Optimized structures, total energies, relative energies, imaginary vibrational frequencies, and  $\nu(\text{CO})$  frequencies for  $\text{Os}_4(\text{CO})_{16}$  (8 isomers),  $\text{Os}_4(\text{CO})_{15}$  (5 isomers),  $\text{Os}_4(\text{CO})_{14}$  (12 isomers),  $\text{Os}_4(\text{CO})_{13}$  (7 isomers), and  $\text{Os}_4(\text{CO})_{12}$  (5 isomers)

**Complete Gaussian 03 reference (Reference 33)**

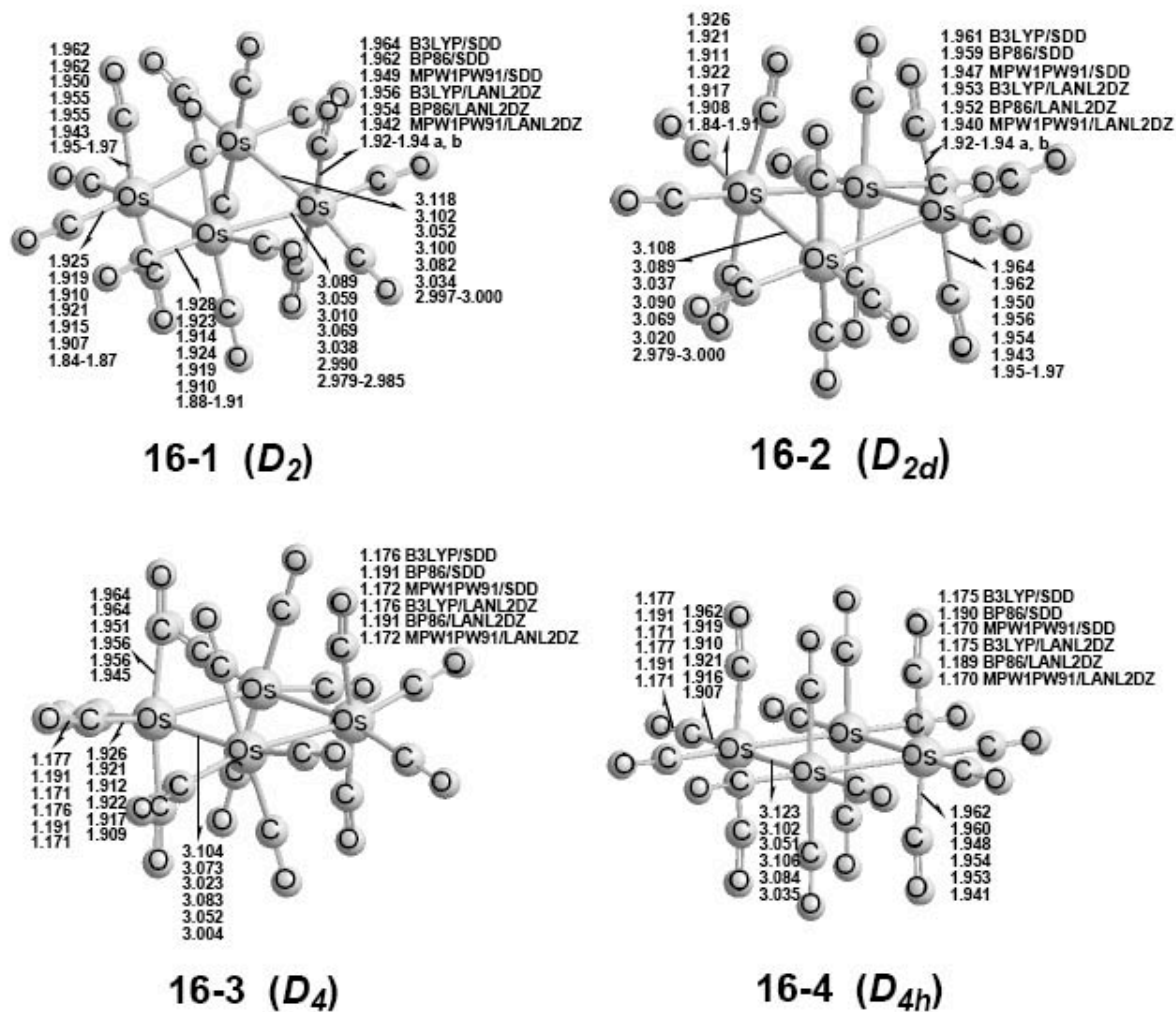

**Figure S1.** The four optimized structures of  $\text{Os}_4(\text{CO})_{16}$  without bridging carbonyl groups.

**Table S1.** The total energies (E, in Hartree) and relative energies ( $\Delta E$ , in kcal/mol) of the four optimized structures of  $\text{Os}_4(\text{CO})_{16}$  without bridging carbonyl groups. The number of imaginary vibrational frequencies (Nimag) for each structure is also listed.

|                      |            | <b>16-1 (<math>D_2</math>)</b> | <b>16-2 (<math>D_{2d}</math>)</b> | <b>16-3 (<math>D_4</math>)</b> | <b>16-4 (<math>D_{4h}</math>)</b> |
|----------------------|------------|--------------------------------|-----------------------------------|--------------------------------|-----------------------------------|
| B3LYP/SDD            | E          | -2176.34426                    | -2176.34402                       | -2176.34170                    | -2176.33889                       |
|                      | $\Delta E$ | 0                              | 0.2                               | 1.6                            | 3.4                               |
|                      | Nimag      | 0                              | 0                                 | 1(17i)                         | 2( 20i, 19i)                      |
| BP86/SDD             | E          | -2177.01905                    | -2177.01806                       | -2177.01790                    | -2177.01285                       |
|                      | $\Delta E$ | 0                              | 0.6                               | 0.7                            | 3.9                               |
|                      | Nimag      | 0                              | 0                                 | 1(11i)                         | 2(25i, 22i)                       |
| MPW1PW91/<br>SDD     | E          | -2175.90635                    | -2175.90502                       | -2175.90459                    | -2175.89838                       |
|                      | $\Delta E$ | 0                              | 0.8                               | 1.1                            | 5.0                               |
|                      | Nimag      | 0                              | 1(14i)                            | 1( 16i)                        | 2(27i, 27i)                       |
| B3LYP/<br>LANL2DZ    | E          | -2177.64112                    | -2177.64060                       | -2177.63890                    | -2177.63528                       |
|                      | $\Delta E$ | 0                              | 0.3                               | 1.4                            | 3.7                               |
|                      | Nimag      | 0                              | 0                                 | 1(14i)                         | 2( 25i, 18i)                      |
| BP86/<br>LANL2DZ     | E          | -2178.21383                    | -2178.21226                       | -2178.21316                    | -2178.20683                       |
|                      | $\Delta E$ | 0                              | 1.0                               | 0.4                            | 4.4                               |
|                      | Nimag      | 0                              | 1(10i)                            | 1( 8i)                         | 2(30i, 20i)                       |
| MPW1PW91/<br>LANL2DZ | E          | -2177.24427                    | -2177.242391                      | -2177.243032                   | -2177.23544                       |
|                      | $\Delta E$ | 0                              | 1.2                               | 0.8                            | 5.5                               |
|                      | Nimag      | 0                              | 1(18i)                            | 1( 13i)                        | 2(33i, 26i)                       |

**Table S2.** The infrared  $\nu(\text{CO})$  vibrational frequencies ( $\text{cm}^{-1}$ ) predicted for  $\text{Os}_4(\text{CO})_{16}$  (infrared intensities in parentheses are in  $\text{km/mol}$ ).

|                        | <b>16-1 (<math>D_2</math>)</b>                                                                                                                                                        | <b>16-2 (<math>D_{2d}</math>)</b>                                                                                                                                                    |
|------------------------|---------------------------------------------------------------------------------------------------------------------------------------------------------------------------------------|--------------------------------------------------------------------------------------------------------------------------------------------------------------------------------------|
| B3LYP /SDD             | 1930(0), 1932(7), 1941(3),<br>1941(6), 1948(275), 1949(251),<br>1950(210), 1962(396), 1969(434),<br>1971(0), 1985(1016), 1984(0),<br>2001(2054) 2024(2562),<br>2024(2431), 2075 (0)   | 1932(0), 1932(0), 1942(3),<br>1942(3), 1948(266), 1948(266),<br>1950(252), 1966(443), 1966(443),<br>1971(0), 1986(918), 1995(0),<br>2003(2102) 2024(2470),<br>2024(2470), 2077 (0)   |
| BP86/SDD               | 1855(0), 1865(9), 1866(6),<br>1869(8), 1878(216), 1880(125),<br>1880(299), 1890(349), 1899(369),<br>1900(0), 1910(1845), 1918(0),<br>1926(701) 1949(1897),<br>1950(2072), 1993 (0)    | 1859(0), 1865(0), 1870(11),<br>1870(11), 1878(242), 1878(242),<br>1880(201), 1896(422), 1896(422),<br>1899(0), 1912(1477), 1921(0),<br>1930(972) 1951(1932),<br>1951(1932), 1995 (0) |
| MPW1PW91/<br>SDD       | 1966(0), 1974(12), 1977(8),<br>1980(3), 1989(293), 1990(157),<br>1991(362), 2000(314), 2011(369),<br>2013(0), 2025(1631), 2034(0),<br>2038(1596) 2066(2478),<br>2066(2714), 2118 (0)  | 1970(0), 1973(0), 1981(1),<br>1981(1), 1989(312), 1989(312),<br>1990(265), 2007(445), 2007(445),<br>2013(0), 2027(1127), 2037(0),<br>2045(1979) 2067(2512),<br>2067(2512), 2120 (0)  |
| B3LYP/<br>LANL2DZ      | 1935(0), 1937(10), 1946(2),<br>1947(10), 1954(304), 1955(271),<br>1955(202), 1967(401), 1975(450),<br>1977(0), 1991(1045), 1999(0),<br>2006(2043) 2030(2538),<br>2030(2387), 2082 (0) | 1936(0), 1937(0), 1947(9),<br>1947(9), 1954(284), 1954(284),<br>1955(259), 1972(472), 1972(472),<br>1976(0), 1992(903), 2001(0),<br>2010(2122) 2031(2420),<br>2031(2420), 2083(0)    |
| BP86/<br>LANL2DZ       | 1860(0), 1871(14), 1872(4),<br>1875(5), 1884(242), 1886(102),<br>1887(325), 1895(338), 1905(0),<br>1905(368), 1916(1947), 1924(0),<br>1931 (631) 1955(1878),<br>1956(2072), 1999 (0)  | 1865(0), 1870(0), 1876(6),<br>1876(6), 1884(268), 1886(268),<br>1886(207), 1902(447), 1902(447),<br>1905(0), 1919(1929), 1927(0),<br>1937 (1025) 1957(1893),<br>1957(1893), 2002(0)  |
| MPW1PW91/<br>LANL2DZ   | 1970(0), 1979(17), 1982(5),<br>1985(2), 1995(339), 1995(133),<br>1997(392), 2004(299), 2017(373),<br>2019(0), 2032(1811), 2039(0),<br>2044 (1474) 2072(2463),<br>2072(2714), 2124 (0) | 1976(0), 1978(0), 1987(0),<br>1987(0), 1995(341), 1995(341),<br>1995(272), 2013(486), 2013(486),<br>2018(0), 2033(1117), 2043(0),<br>2052 (2020) 2074(2463),<br>2074(2463), 2128 (0) |
| Expet. <sup>a, b</sup> | 1993(sh), 2000(w), 2018.5(w), 2036.5(s), 2054(m), 2075.5(vs)                                                                                                                          |                                                                                                                                                                                      |

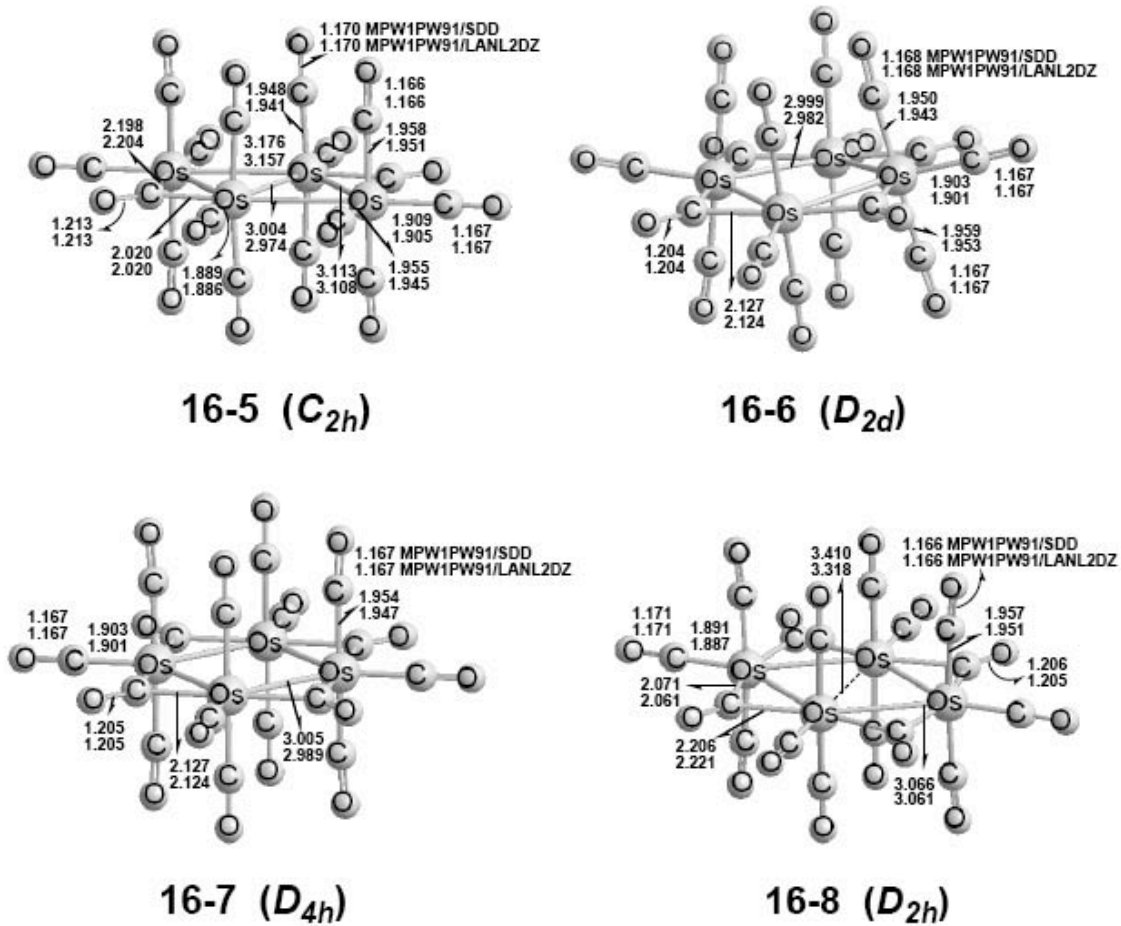

**Figure S2.** The four optimized structures of  $Os_4(CO)_{16}$  with bridging carbonyl groups.

**Table S3.** The total energies (E, in Hartree) and relative energies ( $\Delta E$ , in kcal/mol) of the four optimized  $\text{Os}_4(\text{CO})_{16}$  structures with bridging carbonyl groups. The number of imaginary vibrational frequencies (Nimag) for each structure is also listed.

|                      |            | <b>16-5 (<math>C_{2h}</math>)</b> | <b>16-6 (<math>D_{2d}</math>)</b> | <b>16-7 (<math>D_{4h}</math>)</b> | <b>16-8 (<math>D_{2h}</math>)</b> |
|----------------------|------------|-----------------------------------|-----------------------------------|-----------------------------------|-----------------------------------|
| B3LYP/SDD            | E          | -2176.33324                       | -2176.30919                       | -2176.30888                       | -2176.30780                       |
|                      | $\Delta E$ | 6.9                               | 22                                | 22.3                              | 22.9                              |
|                      | Nimag      | 0                                 | 0                                 | 1(17i)                            | 1(60i)                            |
| BP86/SDD             | E          | -2177.01143                       | -2176.99626                       | -2176.99554                       | -2176.99322                       |
|                      | $\Delta E$ | 4.8                               | 14.3                              | 14.8                              | 16.2                              |
|                      | Nimag      | 0                                 | 0                                 | 1(20i)                            | 1(30i)                            |
| MPW1PW91/<br>SDD     | E          | -2175.89859                       | -2175.87978                       | -2175.87865                       | -2175.87800                       |
|                      | $\Delta E$ | 4.9                               | 16.7                              | 17.4                              | 17.8                              |
|                      | Nimag      | 1(9i)                             | 0                                 | 1(19i)                            | 1(22i)                            |
| B3LYP/<br>LANL2DZ    | E          | -2177.62600                       | -2177.59734                       | -2177.59700                       | -2177.59714                       |
|                      | $\Delta E$ | 9.5                               | 27.5                              | 27.7                              | 27.6                              |
|                      | Nimag      | 0                                 | 1(44i)                            | (33i,15i)                         | 1(86i)                            |
| BP86/<br>LANL2DZ     | E          | -2178.20272                       | -2178.18389                       | -2178.18309                       | -2178.18140                       |
|                      | $\Delta E$ | 7                                 | 18.8                              | 19.3                              | 20.4                              |
|                      | Nimag      | 1(8i)                             | 1(13i)                            | 1(17i)                            | 1(59i)                            |
| MPW1PW91/<br>LANL2DZ | E          | -2177.231611                      | -2177.20849                       | -2177.20724                       | -2177.20721                       |
|                      | $\Delta E$ | 8.0                               | 22.5                              | 23.2                              | 23.3                              |
|                      | Nimag      | 1(12i)                            | 1(20i)                            | 1(17i)                            | 1(57i)                            |

**Table S4.** The infrared  $\nu(\text{CO})$  vibrational frequencies ( $\text{cm}^{-1}$ ) predicted for the higher energy  $\text{Os}_4(\text{CO})_{16}$  isomers (infrared intensities in parentheses are in  $\text{km/mol}$ , bridging  $\nu(\text{CO})$  frequencies are in **bold**).

|                             | MPW1PW91/SDD                                                                                                                                                                                                                                                                                                   | MPW1PW91/LANL2DZ                                                                                                                                                                                                                                                                                                                                                                              |
|-----------------------------|----------------------------------------------------------------------------------------------------------------------------------------------------------------------------------------------------------------------------------------------------------------------------------------------------------------|-----------------------------------------------------------------------------------------------------------------------------------------------------------------------------------------------------------------------------------------------------------------------------------------------------------------------------------------------------------------------------------------------|
| <b>16-3</b><br>( $D_4$ )    | 1955(0), 1978(92), 1978(6), 1978(6),<br>1980(0), 1990(268), 1990(268),<br>2003(258), 2003(258), 2015(0),<br>2022(3443), 2029(0), 2031(0)<br>2064(2733), 2064(2733), 2114(0)                                                                                                                                    | 1960(0), 1983(31), 1983(31),<br>1983(31), 1985(0), 1996(311),<br>1996(311), 2008(255), 2008(255),<br>2020(0), 2028(3490), 2034(0), 2037(0)<br>2070(2715), 2070(2715), 2120(0)                                                                                                                                                                                                                 |
| <b>16-4</b><br>( $D_{4h}$ ) | 1962(0), 1971(0), 1982(0),<br>1986(129), 1986(129), 1987(0),<br>1987(0), 2009(517), 2009(517),<br>2014(0), 2033(3374), 2035(0), 2038(0)<br>2068(2613), 2068(2613), 2120(0)                                                                                                                                     | 1969(0), 1977(0), 1988(0),<br>1991(147), 1991(147), 1994(0),<br>1994(0), 2016(564), 2016(564),<br>2020(0), 2041(3399), 2041(0), 2045(0)<br>2075(2567), 2075(2567), 2127(0)                                                                                                                                                                                                                    |
| <b>16-5</b><br>( $C_{2h}$ ) | <b>1735(1161), 1748(0)</b> , 1966(0),<br>1975(141), 1985(166), 1989(0),<br>2012(875), 2016(0), 2018(0),<br>2036(779), 2037(0), 2042(3371),<br>2048(2040) 2057(0), 2089(2213),<br>2126(0)<br><b>1753(0), 1782(1375), 1782(1375),</b><br><b>1808(0)</b> , 1979(0), 1993(54),                                     | <b>1742(1150), 1755(0)</b> , 1973(0),<br>1981(131), 1990(176), 1994(0),<br>2019(937), 2023(0), 2023(0),<br>2042(729), 2043(0), 2048(3434),<br>2055(2034) 2063(0), 2095(2273),<br>2133(0)<br><b>1758(0), 1787(1344), 1787(1344),</b><br><b>1811(0)</b> , 1985(0), 1998(60),<br>1998(60), 2022(6), 2034(276),<br>2034(276), 2045(3491), 2051(0),<br>2068(87) 2078(2378), 2078(2378),<br>2131(0) |
| <b>16-6</b><br>( $D_{2d}$ ) | 1993(54), 2016(1), 2029(338),<br>2029(338), 2039(3488), 2045(0),<br>2061(62) 2071(2284), 2071(2284),<br>2124(0)<br><b>1751(0), 1781(1394), 1781(1394),</b><br><b>1807(0)</b> , 1974(0), 1997(0), 1997(0),<br>2015(0), 2029(379), 2029(379),<br>2039(3581), 2046(0), 2062(0)<br>2073(2285), 2073(2285), 2125(0) | <b>1756(0), 1786(1365), 1786(1365),</b><br><b>1809(0)</b> , 1980(0), 2003(0), 2003(0),<br>2019(0), 2035(338), 2035(338),<br>2046(3620), 2052(0), 2068(0)<br>2079(2359), 2079(2359), 2132(0)                                                                                                                                                                                                   |
| <b>16-7</b><br>( $D_{4h}$ ) | <b>1751(0), 1764(1764), 1775(1238),</b><br><b>1802(0)</b> , 1983(0), 1985(0), 2009(0),<br>2015(0), 2018(1151), 2031(102),<br>2041(3620), 2049(0), 2073(0)<br>2078(1936), 2083(1993), 2128(0)                                                                                                                   | <b>1758(0), 1771(1712), 1781(1219),</b><br><b>1807(0)</b> , 1989(0), 1990(1), 2017(0),<br>2021(0), 2024(1192), 2035(98),<br>2048(3680), 2054(0), 2080(0)<br>2086(1934), 2089(2004), 2135(0)                                                                                                                                                                                                   |

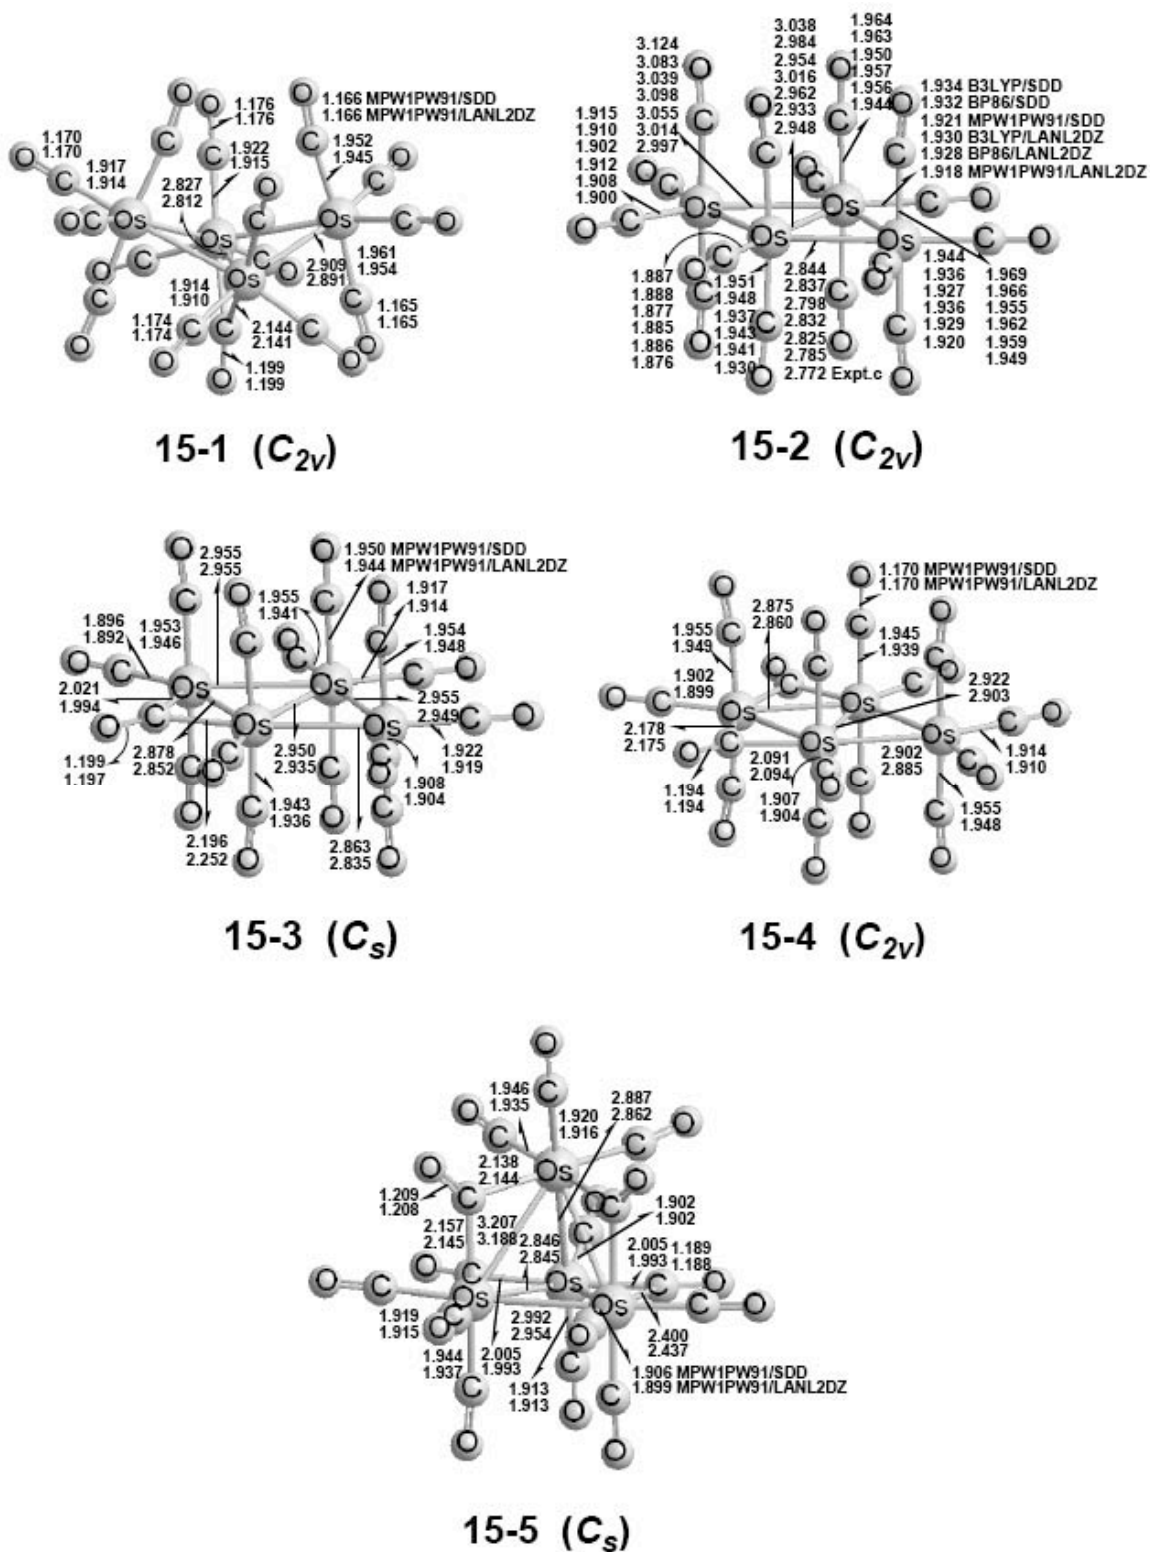

Figure S3. The five optimized structures of  $\text{Os}_4(\text{CO})_{15}$ .



**Table S5.** The total energies (E, in Hartree) and relative energies ( $\Delta E$ , in kcal/mol) of the five optimized structures of  $\text{Os}_4(\text{CO})_{15}$ . The number of imaginary vibrational frequencies (Nimag) for each structure is also listed.

|                  | <b>15-1</b> ( $C_{2v}$ ) | <b>15-2</b> ( $C_{2v}$ ) | <b>15-3</b> ( $C_s$ ) | <b>15-4</b> ( $C_{2v}$ ) | <b>15-5</b> ( $C_s$ ) |
|------------------|--------------------------|--------------------------|-----------------------|--------------------------|-----------------------|
| MPW1PW91/SDD     |                          |                          |                       |                          |                       |
| E                | -2062.62207              | -2062.62066              | -2062.62355           | -2062.62372              | -2062.58802           |
| $\Delta E$       | 0                        | 0.9                      | -0.9                  | -1.0                     | 21.4                  |
| Nimag            | 0                        | 0                        | 0                     | 0                        | 1(57i)                |
| MPW1PW91/LANL2DZ |                          |                          |                       |                          |                       |
| E                | -2063.96144              | -2063.96043              | -2063.96032           | -2063.95937              | -2063.92194           |
| $\Delta E$       | 0                        | 0.6                      | 0.7                   | 1.3                      | 24.8                  |
| Nimag            | 0                        | 0                        | 0                     | 1(23i)                   | 2(58i,16i)            |

**Table S6.** The infrared  $\nu(\text{CO})$  vibrational frequencies ( $\text{cm}^{-1}$ ) predicted for isomer **15-2** of  $\text{Os}_4(\text{CO})_{15}$  (infrared intensities in parentheses are in  $\text{km/mol}$ ).

|                    | <b>15-2</b> ( $C_{2v}$ )                                                                                                                                         |
|--------------------|------------------------------------------------------------------------------------------------------------------------------------------------------------------|
| B3LYP / SDD        | 1898(177), 1919(249), 1940(7), 1944(43), 1948(13), 1963(0), 1965(487), 1969(617), 1976(311), 1976(644), 1915(2538), 1994(3148), 2015(1456), 2030(2400), 2078 (2) |
| BP86/ SDD          | 1826(152), 1856(140), 1870(52), 1873(25), 1878(5), 1886(0), 1895(538), 1895(773), 1904(58), 1908(343), 1914(546), 1915(2538), 1942(1220), 1956(1934), 1997 (1)   |
| MPW1PW91/ SDD      | 1934(207), 1959(238), 1981(8), 1983(39), 1988(3), 2003(0), 2005(325), 2010(793), 2018(1047), 2018(217), 2029(529), 2035(3221), 2057(1456), 2074(2338), 2121 (1)  |
| B3LYP / LANL2DZ    | 1904(182), 1923(254), 1946(9), 1951(55), 1953(10), 1969(0), 1971(448), 1974(711), 1982(242), 1982(861), 1994(559), 2001(3158), 2022(1386), 2037(2335), 2084 (2)  |
| BP86/ LANL2DZ      | 1833(156), 1861(144), 1877(62), 1879(23), 1883(1), 1893(0), 1901(815), 1902(518), 1910(37), 1914(315), 1919(738), 1922(2546), 1949(1174), 1963(1894), 2003 (2)   |
| MPW1PW91/ LANL2DZ  | 1940(213), 1963(242), 1987(10), 1990(54), 1994(1), 2009(0), 2012(288), 2015(894), 2024(150), 2025(1140), 2034(545), 2042(3257), 2065(1396), 2081(2272), 2129 (2) |
| Expt. <sup>c</sup> | 1939(m, br), 2002(sh), 2023(m), 2045(vs), 2074(m), 2086(s)                                                                                                       |

**Table S7.** The infrared  $\square(\text{CO})$  vibrational frequencies ( $\text{cm}^{-1}$ ) predicted for the five optimized  $\text{Os}_4(\text{CO})_{15}$  isomers (infrared intensities in parentheses are in  $\text{km/mol}$ , bridging  $\square(\text{CO})$  frequencies are in **bold**).

|                             | MPW1PW91/SDD                                                                                                                                                                                                  | MPW1PW91/LANL2DZ                                                                                                                                                                                              |
|-----------------------------|---------------------------------------------------------------------------------------------------------------------------------------------------------------------------------------------------------------|---------------------------------------------------------------------------------------------------------------------------------------------------------------------------------------------------------------|
| <b>15-1</b><br>( $C_{2v}$ ) | <b>1792(551)</b> , 1968(387), 1971(0),<br>1972(0), 1975(291), 1996(73),<br>2008(358), 2010(0), 2020 (37)<br>2028(314), 2030(1112), 2034(3410),<br>2043(1571), 2083(2431), 2117(81)                            | <b>1797(523)</b> , 1974(387), 1978(0),<br>1978(0), 1981(310), 2002(102),<br>2014(408), 2016(0), 2026 (68)<br>2033(295), 2036(1010), 2040(3421),<br>2049(1687), 2089(2390), 2124(83)                           |
| <b>15-3</b><br>( $C_s$ )    | <b>1828(607)</b> , 1944(500), 1960(28),<br>1980(133), 1987(353), 1991(330),<br>1997(56), 2000(414), 2014(519),<br>2026(93), 2034(3367), 2043(857),<br>2057(1104), 2073(2239), 2121 (54)                       | <b>1846(547)</b> , 1964(40), 1968(373),<br>1987(180), 1991(414), 1995(308),<br>2003(42), 2004(410), 2021(499),<br>2032(118), 2042(3358), 2047(866),<br>2063(1137), 2079(2217), 2128 (59)                      |
| <b>15-4</b><br>( $C_{2v}$ ) | <b>1824(1167)</b> , <b>1857(556)</b> , 1968(0),<br>1969(15), 1989(146), 1994(290),<br>2001(53), 2006(516), 2009(692),<br>2025(71), 2033(3538), 2048(1976),<br>2050(66), 2079(2026), 2121 (39)                 | <b>1828(1157)</b> , <b>1859(552)</b> , 1974(0),<br>1975(13), 1995(131), 2000(262),<br>2007(49), 2012(528), 2015(722),<br>2031(84), 2040(3594), 2055 (1991),<br>2056 (52), 2086(2016), 2128(43)                |
| <b>15-5</b><br>( $C_s$ )    | <b>1700(618)</b> , <b>1763(665)</b> , <b>1847(653)</b> ,<br><b>1894(139)</b> , 1985(0), 1994(7),<br>2000(441), 2008(237), 2009(304),<br>2027(881), 2038(413), 2056 (2317)<br>2065(2374), 2069(2129), 2107(30) | <b>1708(628)</b> , <b>1771(642)</b> , <b>1863(573)</b> ,<br><b>1905(127)</b> , 1989(0), 2001(6),<br>2005(425), 2013(294), 2014 (304)<br>2033(917), 2042(406), 2063(2368),<br>2070(2419), 2076(2150), 2113(20) |

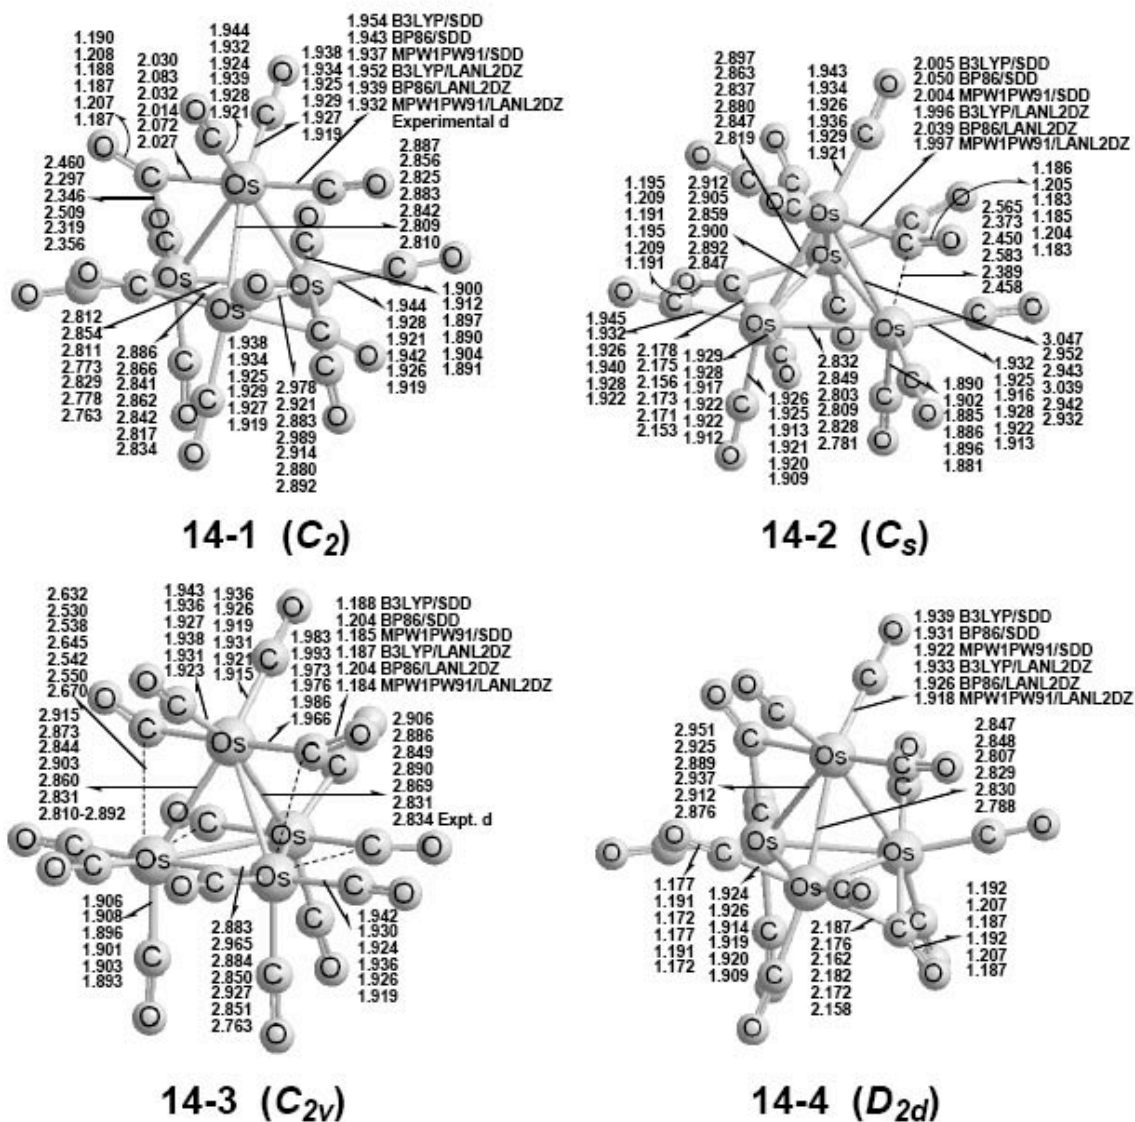

**Figure S4.** The four lowest lying optimized structures of  $Os_4(CO)_{14}$ .

**Table S8.** The total energies (E, in Hartree) and relative energies ( $\Delta E$ , in kcal/mol) of the four lowest lying optimized structures of  $\text{Os}_4(\text{CO})_{14}$ . The number of imaginary vibrational frequencies (Nimag) for each structure is also listed.

|                      |            | <b>14-1(<math>C_2</math>)</b> | <b>14-2(<math>C_s</math>)</b> | <b>14-3(<math>C_{2v}</math>)</b> | <b>14-4(<math>D_{2d}</math>)</b> |
|----------------------|------------|-------------------------------|-------------------------------|----------------------------------|----------------------------------|
| B3LYP/SDD            | E          | -1949.69837                   | -1949.69823                   | -1949.69614                      | -1949.69587                      |
|                      | $\Delta E$ | 0                             | 0.09                          | 1.3                              | 1.5                              |
|                      | Nimag      | 0                             | 0                             | 1(16i)                           | 2(16i,16i)                       |
| BP86/SDD             | E          | -1950.37018                   | -1950.37000                   | -1950.36816                      | -1950.36960                      |
|                      | $\Delta E$ | 0                             | 0.11                          | 1.2                              | 0.2                              |
|                      | Nimag      | 0                             | 0                             | 1(13i)                           | 2(14i,14i)                       |
| MPW1PW91/<br>SDD     | E          | -1949.33904                   | -1949.33850                   | -1949.33771                      | -1949.3367                       |
|                      | $\Delta E$ | 0                             | 0.3                           | 0.8                              | 1.5                              |
|                      | Nimag      | 0                             | 1(15i)                        | 2(10i,3i)                        | 2(37i,37i)                       |
| B3LYP/<br>LANL2DZ    | E          | -1950.99738                   | -1950.9971                    | -1950.99444                      | -1950.99451                      |
|                      | $\Delta E$ | 0                             | 0.18                          | 1.7                              | 1.6                              |
|                      | Nimag      | 0                             | 0                             | 1(15i)                           | 2(53i,53i)                       |
| BP86/<br>LANL2DZ     | E          | -1951.56742<br>(99590)        | -1951.56742                   | -1951.56474                      | -1951.56697                      |
|                      | $\Delta E$ | 0                             | 0.02                          | 1.7                              | 0.3                              |
|                      | Nimag      | 0                             | 1(6i)                         | 1(16i)                           | 2(16i,16i)                       |
| MPW1PW91/<br>LANL2DZ | E          | -1950.67800                   | -1950.67770                   | -1950.67592                      | -1950.67593                      |
|                      | $\Delta E$ | 0                             | 0.2                           | 1.3                              | 1.3                              |
|                      | Nimag      | 0                             | 1(12i)                        | 1(13i)                           | 2(38i,38i)                       |

**Table S9.** The infrared  $\nu(\text{CO})$  vibrational frequencies ( $\text{cm}^{-1}$ ) predicted for isomers **14-1** and **14-2** of  $\text{Os}_4(\text{CO})_{14}$  (infrared intensities in parentheses are in  $\text{km/mol}$ , bridging  $\nu(\text{CO})$  frequencies are in **bold**).

|                      | <b>14-1 (<math>C_2</math>)</b>                                                                                                                                              | <b>14-2 (<math>C_s</math>)</b>                                                                                                                                                 |
|----------------------|-----------------------------------------------------------------------------------------------------------------------------------------------------------------------------|--------------------------------------------------------------------------------------------------------------------------------------------------------------------------------|
| B3LYP/<br>SDD        | <b>1854(2), 1859(825)</b> , 1934(40),<br>1936(133), 1943(0), 1947(7),<br>1962(237), 1965(499),<br>1970(281), 1972(144),<br>1978(2283), 2008(2630),<br>2011(2699), 2054(9)   | <b>1812(445), 1882(429)</b> , 1934(92),<br>1937(121), 1946(2), 1949(95),<br>1959(212), 1968(412),<br>1971(153), 1972(157),<br>1996(2322), 2007(2761),<br>2011(2639), 2054(9)   |
| BP86/<br>SDD         | <b>1760(1), 1764(687)</b> , 1868(87),<br>1869(195), 1876(13), 1876(7),<br>1886(155), 1896(313),<br>1901(253), 1901(47),<br>1922(1848), 1935(2292),<br>1935(2151), 1973(19)  | <b>1750(311), 1781(381)</b> ,<br>1867(126), 1869(193), 1875(2),<br>1878(31), 1885(133), 1898(180),<br>1899(89), 1900(319),<br>1921(1783), 1933(2327),<br>1936(2199), 1972(14)  |
| MPW1PW91/<br>SDD     | <b>1868(6), 1874(920)</b> , 1975(98),<br>1977(2), 1983(58), 1991(1),<br>2002(236), 2004(471),<br>2015(299), 2019(152),<br>2042(2558), 2053(2564),<br>2054(2744), 2100(28)   | <b>1848(456), 1906(491)</b> , 1975(72),<br>1979(134), 1988(39), 1989(1),<br>2000(198), 2008(382),<br>2014(153), 2014(222),<br>2039(2482), 2049(2847),<br>2054(2710), 2098(16)  |
| B3LYP/<br>LANL2DZ    | <b>1875(22), 1879(750)</b> , 1938(78),<br>1940(231), 1946(14), 1953(2),<br>1968(104), 1971(566),<br>1975(266), 1977(254),<br>2003(2120), 2014(2716),<br>2017(2679), 2060(0) | <b>1817(434), 1892(398)</b> , 1940(135),<br>1942(148), 1952(2), 1954(102),<br>1965(183), 1974(423),<br>1977(158), 1977(197),<br>2003(2279), 2014(2749),<br>2017(2659), 2060(4) |
| BP86/<br>LANL2DZ     | <b>1768(0), 1772(669)</b> , 1873(129),<br>1874(217), 1881(2), 1882(6),<br>1893(129), 1903(273),<br>1906(64), 1907(350),<br>1928(1778), 1941(2184),<br>1941(2297), 1979(12)  | <b>1754(310), 1789(360)</b> ,<br>1873(156), 1875(210), 1881(1),<br>1884(20), 1892(122), 1905(151),<br>1905(87), 1907(404),<br>1928(1753), 1940(2319),<br>1942(2210), 1979(9)   |
| MPW1PW91/<br>LANL2DZ | <b>1881(0), 1886(894)</b> , 1983(45),<br>1983(121), 1990(21), 1996(8),<br>2009(204), 2012(513),<br>2021(316), 2022(194),<br>2048(2411), 2058(2690),<br>2060(2802), 2106(13) | <b>1853(448), 1915(465)</b> ,<br>1981(114), 1985(157), 1994(37),<br>1994(4), 2007(166), 2015(418),<br>2020(198), 2020(222),<br>2046(2425), 2057(2859),<br>2060(2760), 2105(8)  |
| Experimental         | 1938(vw,br), 2018(m), 2058(s)                                                                                                                                               |                                                                                                                                                                                |

**Table S10.** The infrared  $\square(\text{CO})$  vibrational frequencies ( $\text{cm}^{-1}$ ) predicted for isomers **14-3** and **14-4** of  $\text{Os}_4(\text{CO})_{14}$  (infrared intensities in parentheses are in  $\text{km/mol}$ , bridging  $\square(\text{CO})$  frequencies are in **bold**).

|                      | <b>14-3</b> ( $C_{2v}$ )                                                                                                                                                              | <b>14-4</b> ( $D_{2d}$ )                                                                                                                                                       |
|----------------------|---------------------------------------------------------------------------------------------------------------------------------------------------------------------------------------|--------------------------------------------------------------------------------------------------------------------------------------------------------------------------------|
| B3LYP/<br>SDD        | <b>1858(0)</b> , <b>1877(977)</b> , 1892(59),<br>1908(110), 1936(0), 1950(51),<br>1958(292), 1965(171),<br>1973(382), 1983(235),<br>2001(2684), 2015(2417),<br>2015(2222), 2058(43)   | <b>1832(0)</b> , <b>1834(959)</b> , 1937(262),<br>1937(262), 1944(0), 1948(0),<br>1955(0), 1970(72),<br>1970(72), 1972(302),<br>1992(2351), 2007(2922),<br>2007(2922), 2052(0) |
| BP86/<br>SDD         | <b>1775(0)</b> , <b>1793(883)</b> , 1811(65),<br>1826(122), 1872(0), 1878(134),<br>1889(130), 1892(220),<br>1904(216), 1914(132),<br>1924(2226), 1938(1948),<br>1947(1757), 1979(100) | <b>1760(0)</b> , <b>1761(705)</b> , 1869(269),<br>1869(269), 1874(0), 1878(0),<br>1883(0), 1898(37), 1898(37),<br>1902(416), 1919(1707),<br>1933(2379), 1933(2379),<br>1971(0) |
| MPW1PW91/<br>SDD     | <b>1880(0)</b> , <b>1901(1155)</b> , 1916(86),<br>1936(156), 1981(0), 1992(102),<br>2004(223), 2006(161),<br>2018(353), 2030(243),<br>2044(2737), 2059(2425),<br>2063(2275), 2104(72) | <b>1870(0)</b> , <b>1871(997)</b> , 1979(246),<br>1979(246), 1986(0), 1989(0),<br>1997(0), 2011(240),<br>2013(93), 2013(93),<br>2036(2481), 2049(3024),<br>2049(3024), 2096(0) |
| B3LYP/<br>LANL2DZ    | <b>1869(0)</b> , <b>1887(897)</b> , 1901(54),<br>1916(98), 1941(0), 1957(34),<br>1962(376), 1972(176),<br>1978(428), 1986(262),<br>2008(2649), 2019(2206),<br>2021(2433), 2064(29)    | <b>1836(0)</b> , <b>1837(928)</b> , 1943(299),<br>1943(299), 1949(0), 1954(0),<br>1960(0), 1977(66),<br>1977(66), 1979(310),<br>1998(2379), 2014(2896),<br>2014(2896), 2059(0) |
| BP86/<br>LANL2DZ     | <b>1785(0)</b> , <b>1802(840)</b> , 1819(63),<br>1834(119), 1878(0), 1885(117),<br>1897(134), 1897(268),<br>1910(270), 1918(147),<br>1932(2187), 1946(1963),<br>1951(1745), 1985(81)  | <b>1763(0)</b> , <b>1764(683)</b> , 1875(297),<br>1875(297), 1880(0), 1885(0),<br>1889(0), 1905(33),<br>1905(33), 1910(434),<br>1925(1718), 1940(2364),<br>1940(2364), 1978(0) |
| MPW1PW91/<br>LANL2DZ | <b>1891(0)</b> , <b>1911(1085)</b> , 1926(84),<br>1944(153), 1987(0), 1999(80),<br>2008(299), 2013(161),<br>2024(427), 2033(269),<br>2052(2696), 2066(2272),<br>2066(2458), 2111(53)  | <b>1873(0)</b> , <b>1874(969)</b> , 1985(290),<br>1985(290), 1992(0), 1996(0),<br>2003(0), 2019(259),<br>2020(85), 2020(85),<br>2043(2511), 2057(3012),<br>2057(3012), 2104(0) |
| Experimental         | 1938(vw, br), 2018(m), 2058(s)                                                                                                                                                        |                                                                                                                                                                                |

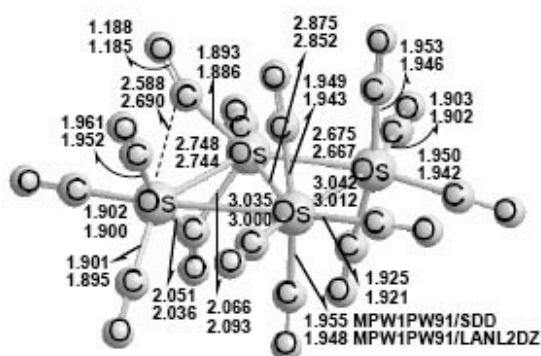14-5 ( $C_1$ )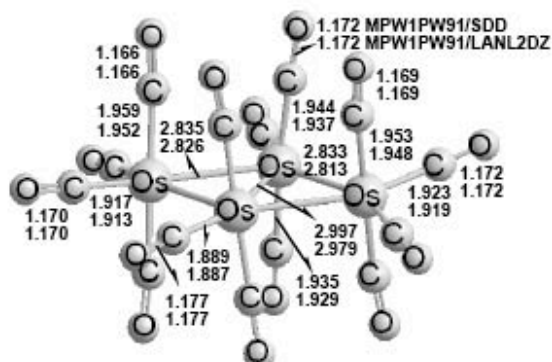14-6 ( $C_2$ )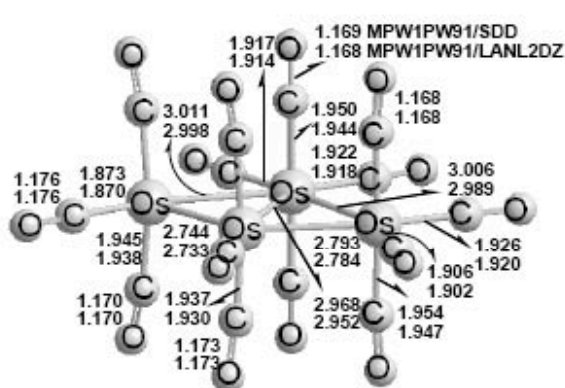14-7 ( $C_s$ )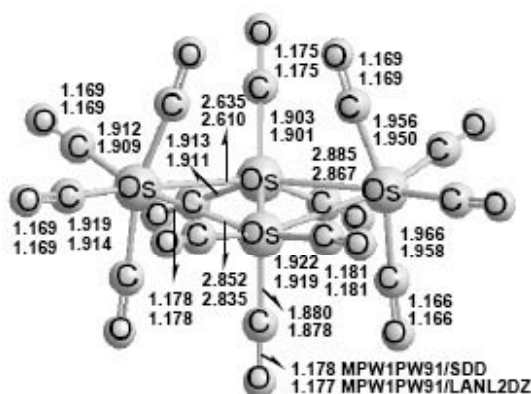14-8 ( $C_s$ )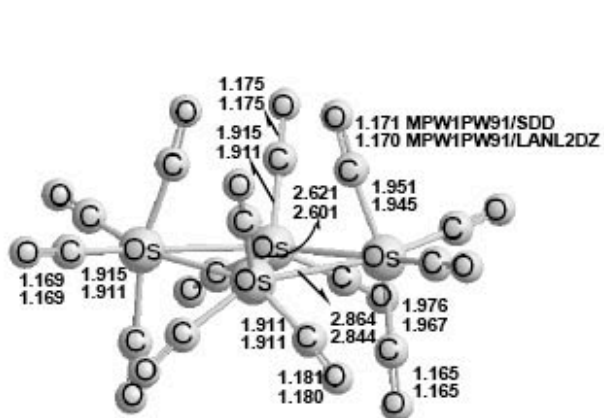14-9 ( $C_{2v}$ )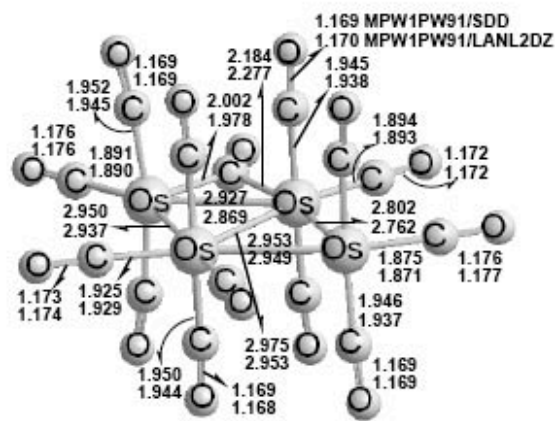14-10 ( $C_s$ )

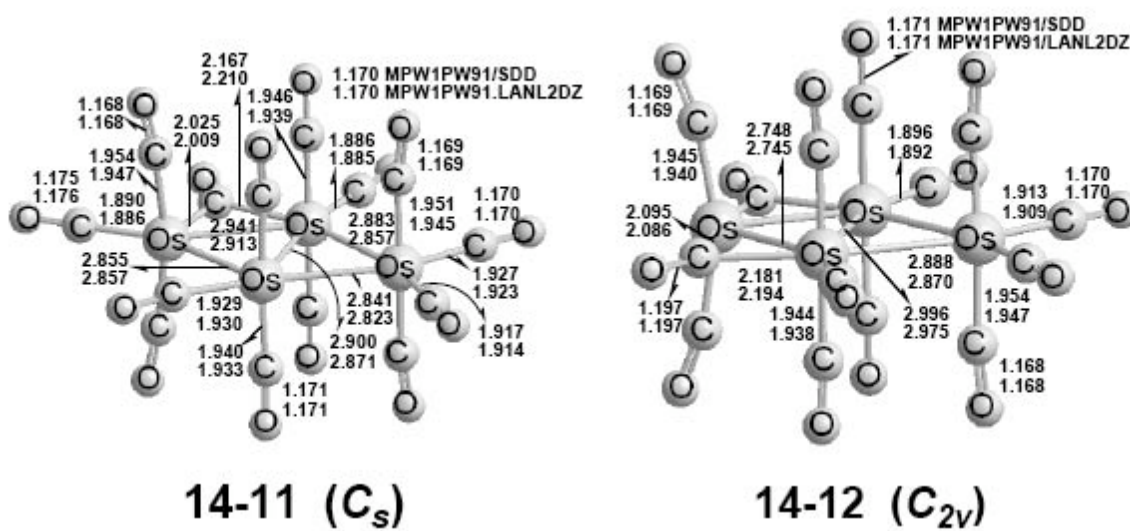

**Figure S5.** Eight butterfly isomers of  $Os_4(CO)_{14}$ .



**Table S11.** The total energies (E, in Hartree) and relative energies ( $\Delta E$ , in kcal/mol) of structures **14-5** to **14-9** of  $\text{Os}_4(\text{CO})_{14}$ . The number of imaginary vibrational frequencies (Nimag) for each structure is also listed.

|                      |            | <b>14-5</b> ( $C_1$ ) | <b>14-6</b> ( $C_2$ ) | <b>14-7</b> ( $C_s$ ) | <b>14-8</b> ( $C_s$ ) | <b>14-9</b> ( $C_{2v}$ ) |
|----------------------|------------|-----------------------|-----------------------|-----------------------|-----------------------|--------------------------|
| MPW1PW91/<br>SDD     | E          | -1949.33226           | -1949.29588           | -1949.29685           | -1949.29478           | -1949.29445              |
|                      | $\Delta E$ | 4.3                   | 27.1                  | 26.4                  | 27.8                  | 28.0                     |
|                      | Nimag      | 0                     | 0                     | 0                     | 1(10i)                | 1(24i)                   |
| MPW1PW91/<br>LANL2DZ | E          | -1950.66978           | -1950.63554           | -1950.63440           | -1950.63582           | -1950.63513              |
|                      | $\Delta E$ | 5.2                   | 26.6                  | 27.4                  | 26.5                  | 26.9                     |
|                      | Nimag      | 0                     | 0                     | 0                     | 1(13i)                | 1(28i)                   |

**Table S12.** The total energies (E, in Hartree) and relative energies ( $\Delta E$ , in kcal/mol) of structures **14-10** to **14-12** of  $\text{Os}_4(\text{CO})_{14}$ . The number of imaginary vibrational frequencies (Nimag) for each structure is also listed.

|                      |            | <b>14-10</b> ( $C_s$ ) | <b>14-11</b> ( $C_s$ ) | <b>14-12</b> ( $C_{2v}$ ) |
|----------------------|------------|------------------------|------------------------|---------------------------|
| MPW1PW91/<br>SDD     | E          | -1949.29371            | -1949.28839            | -1949.28069               |
|                      | $\Delta E$ | 28.4                   | 31.8                   | 36.6                      |
|                      | Nimag      | 0                      | 0                      | 0                         |
| MPW1PW91/<br>LANL2DZ | E          | -1950.62921            | -1950.62420            | -1950.61444               |
|                      | $\Delta E$ | 30.6                   | 33.8                   | 39.9                      |
|                      | Nimag      | 0                      | 0                      | 0                         |

**Table S13.** The infrared  $\square(\text{CO})$  vibrational frequencies ( $\text{cm}^{-1}$ ) predicted for the higher energy  $\text{Os}_4(\text{CO})_{14}$  structures (infrared intensities in parentheses are in  $\text{km/mol}$ , bridging  $\square(\text{CO})$  frequencies are in **bold**).

|                              | MPW1PW91/SDD                                                                                                                                                                          | MPW1PW91/LANL2DZ                                                                                                                                                                       |
|------------------------------|---------------------------------------------------------------------------------------------------------------------------------------------------------------------------------------|----------------------------------------------------------------------------------------------------------------------------------------------------------------------------------------|
| <b>14-5</b><br>( $C_I$ )     | <b>1787(306)</b> , <b>1904(317)</b> , 1984(220),<br>1987(42), 1989(188), 2003(228),<br>2006(67), 2012(1097), 2018(339),<br>2027(2294), 2034(1175),<br>2060(975), 2073(2570), 2110(70) | <b>1798(296)</b> , <b>1928(291)</b> , 1991(202),<br>1992(29), 1996(165), 2009(146),<br>2010(251), 2018(1030),<br>2025(433), 2033(2283), 2040(1218),<br>2066(974), 2078(2567), 2117(82) |
| <b>14-6</b><br>( $C_2$ )     | 1943(11), 1949(259), 1968(675),<br>1971(61), 1994(415), 2001(223),<br>2006(393), 2008(374), 2026(494),<br>2029(2933), 2033(2902), 2035(1),<br>2074(1953), 2119(55)                    | 1949(14), 1954(271), 1973(674),<br>1977(62), 2001(402), 2007(147),<br>2012(339), 2015(357), 2031(452),<br>2035(3043), 2039(2995), 2041(3),<br>2081(1994), 2125(47)                     |
| <b>14-7</b><br>( $C_s$ )     | 1931(11), 1953(455), 1961(135),<br>1965(562), 1988(223), 1988(67),<br>1993(843), 2012(288), 2020(269),<br>2028(3122), 2030(569),<br>2052(1511), 2066(2077), 2116(76)                  | 1938(0), 1963(542), 1967(71),<br>1971(611), 1993(339), 1995(35),<br>1998(744), 2019(306), 2026(309),<br>2035(558), 2036(3148),<br>2059(1539), 2072(1964), 2122(82)                     |
| <b>14-8</b><br>( $C_s$ )     | 1928(61), 1939(676), 1946(131),<br>1952(202), 1983(325), 1993(35),<br>2000(15), 2016(2), 2022(2795),<br>2028(233), 2030(2505),<br>2036(568), 2076(2972), 2108(1)                      | 1936(60), 1947(665), 1953(141),<br>1959(203), 1991(309), 2002(48),<br>2007(7), 2022(5), 2029(2962),<br>2034(264), 2037(2392),<br>2042(607), 2083(2919), 2116(1)                        |
| <b>14-9</b><br>( $C_{2v}$ )  | 1936(0), 1936(232), 1943(268),<br>1944(522), 1988(10), 1992(230),<br>1994(177), 2015(0), 2023(3227),<br>2026(2090), 2031(332),<br>2035(546), 2078(2789), 2108(1)                      | 1945(0), 1939(676), 1951(234),<br>1952(538), 1998(210), 2002(31),<br>2003(104), 2020(0), 2029(3322),<br>2035(2349), 2036(367),<br>2041(360), 2084(2733), 2115(0)                       |
| <b>14-10</b><br>( $C_s$ )    | <b>1805(468)</b> , 1945(237), 1956(165),<br>1977(159), 1980(1), 1984(62),<br>1989(629), 1995(1072),<br>2014(219), 2028(3522), 2043(46),<br>2053(1307), 2064(2093), 2115(3)            | <b>1841(462)</b> , 1957(158), 1978(541),<br>1981(214), 1987(190), 1988(9),<br>1990(312), 1998(1233),<br>2017(144), 2034(3489), 2046(40),<br>2059(1423), 2068(1982), 2121(1)            |
| <b>14-11</b><br>( $C_s$ )    | <b>1807(505)</b> , 1943(604), 1950(31),<br>1967(0), 1991(319), 1992(17),<br>1997(389), 1999(798), 2012(145),<br>2024(3676), 2037(525),<br>2047(1087), 2067(2363), 2114(19)            | <b>1824(505)</b> , 1947(604), 1956(30),<br>1971(2), 1995(411), 1999(26),<br>2002(336), 2005(754), 2018(152),<br>2031(3706), 2044(483),<br>2052(1114), 2074(2313), 2121(27)             |
| <b>14-12</b><br>( $C_{2v}$ ) | <b>1807(1169)</b> , <b>1856(679)</b> , 1942(140),<br>1963(0), 1979(389), 1984(225),<br>1991(2), 2006(714), 2020(90),<br>2023(3261), 2038(13), 2045(1944),<br>2060(1703), 2115(157)    | <b>1810(1150)</b> , <b>1858(691)</b> , 1949(87),<br>1968(0), 1986(392), 1989(206),<br>1996(1), 2012(701), 2026(96),<br>2030(3350), 2045(1), 2051(2011),<br>2068(1647), 2121(159)       |

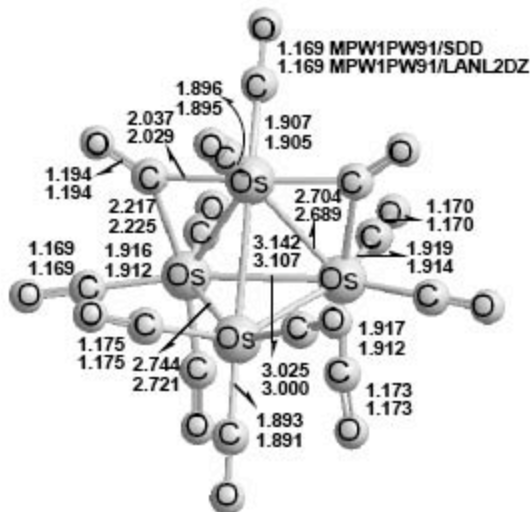13-1 ( $C_s$ )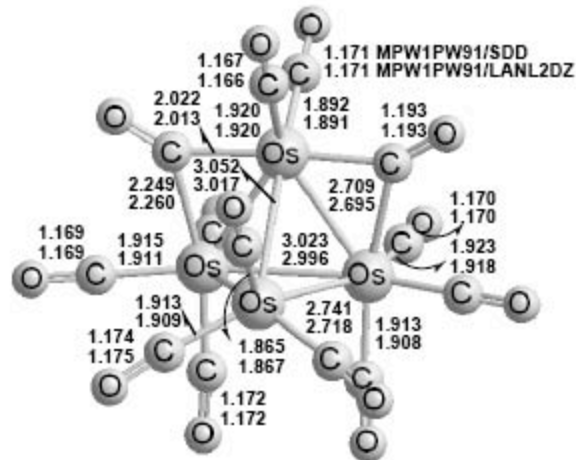13-2 ( $C_s$ )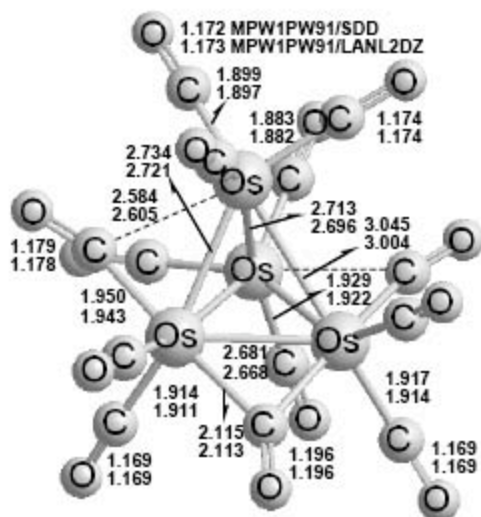13-3 ( $C_2$ )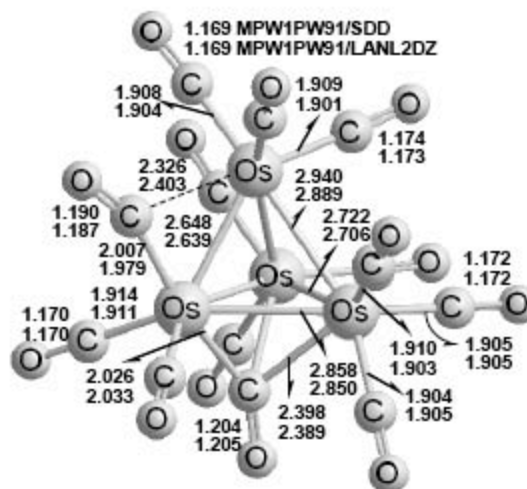13-4 ( $C_s$ )

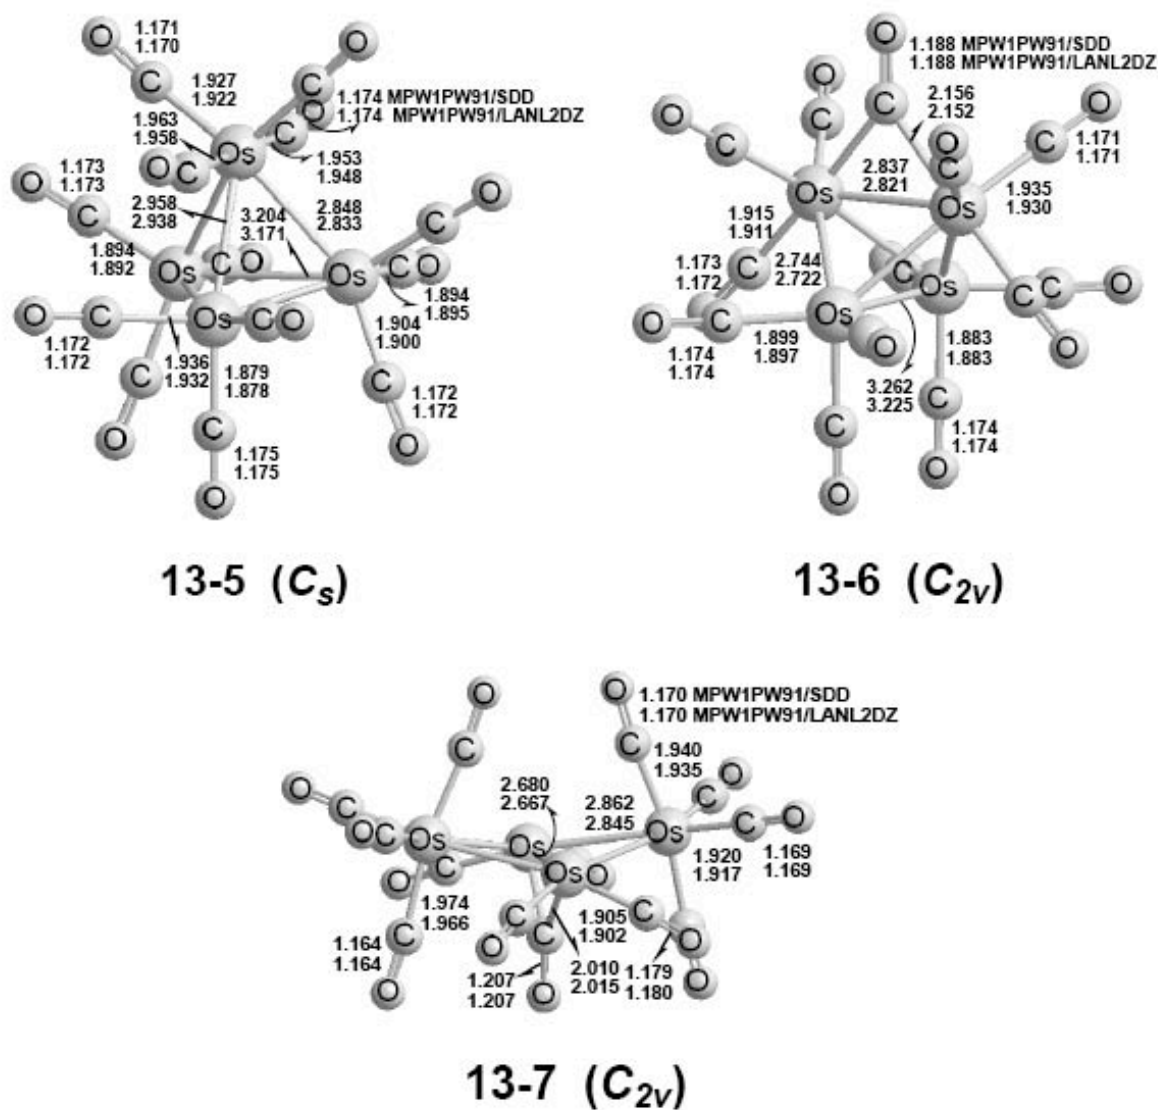

**Figure S6.** The seven optimized structures of  $Os_4(CO)_{13}$ .

**Table S14.** The total energies ( $E$ , in Hartree) and relative energies ( $\Delta E$ , in kcal/mol) of the four lowest lying optimized structures of  $Os_4(CO)_{13}$ . The number of imaginary vibrational frequencies ( $N_{\text{imag}}$ ) for each structure is also listed.

|                      |                   | <b>13-1 (<math>C_s</math>)</b> | <b>13-2 (<math>C_s</math>)</b> | <b>13-3 (<math>C_2</math>)</b> | <b>13-4 (<math>C_s</math>)</b> |
|----------------------|-------------------|--------------------------------|--------------------------------|--------------------------------|--------------------------------|
| MPW1PW91/<br>SDD     | $E$               | -1836.03282                    | -1836.03082                    | -1836.02950                    | -1836.02407                    |
|                      | $\Delta E$        | 0                              | 1.3                            | 2.1                            | 5.5                            |
|                      | $N_{\text{imag}}$ | 0                              | 1(9i)                          | 1(37i)                         | 1(19i)                         |
| MPW1PW91/<br>LANL2DZ | $E$               | -1837.37054                    | -1837.36841                    | -1837.36782                    | -1837.36118                    |
|                      | $\Delta E$        | 0                              | 1.3                            | 1.7                            | 5.9                            |
|                      | $N_{\text{imag}}$ | 0                              | 1(11i)                         | 1(29i)                         | 1(26i)                         |

**Table S15.** The total energies (E, in Hartree) and relative energies ( $\Delta E$ , in kcal/mol) of the three remaining optimized structures of  $\text{Os}_4(\text{CO})_{13}$ . The number of imaginary vibrational frequencies (Nimag) for each structure is also listed.

|                      |            | <b>13-5 (<math>C_s</math>)</b> | <b>13-6 (<math>C_{2v}</math>)</b> | <b>13-7 (<math>C_{2v}</math>)</b> |
|----------------------|------------|--------------------------------|-----------------------------------|-----------------------------------|
| MPW1PW91/<br>SDD     | E          | -1836.01625                    | -1836.00767                       | -1835.98721                       |
|                      | $\Delta E$ | 10.4                           | 15.8                              | 28.6                              |
|                      | Nimag      | 1(27i)                         | 3(36i,27i,17i)                    | 1(26i)                            |
| MPW1PW91/<br>LANL2DZ | E          | -1837.35707                    | -1837.34800                       | -1837.32437                       |
|                      | $\Delta E$ | 8.5                            | 14.1                              | 29                                |
|                      | Nimag      | 1(27i)                         | 3(37i,27i,2i)                     | 1(25i)                            |

**Table S16.** The infrared  $\square(\text{CO})$  vibrational frequencies ( $\text{cm}^{-1}$ ) predicted for the seven  $\text{Os}_4(\text{CO})_{13}$  optimized structures (infrared intensities in parentheses are in  $\text{km/mol}$ , bridging  $\square(\text{CO})$  frequencies are in **bold**).

|                                    | MPW1PW91/SDD                                                                                                                                                             | MPW1PW91/LANL2DZ                                                                                                                                                         |
|------------------------------------|--------------------------------------------------------------------------------------------------------------------------------------------------------------------------|--------------------------------------------------------------------------------------------------------------------------------------------------------------------------|
| <b>13-1</b> ( $\text{C}_s$ )       | <b>1826(742)</b> , <b>1873(385)</b> , 1975(269),<br>1977(229), 1979(9), 1997(242),<br>2006(20), 2013(625), 2018(614),<br>2043(2557), 2050(2525),<br>2052(2022), 2094(19) | <b>1834(712)</b> , <b>1878(381)</b> , 1982(260),<br>1983(253), 1987(2), 2004(278),<br>2014(4), 2020(601), 2024(565),<br>2049(2639), 2057(2537),<br>2059(2049), 2101(23)  |
| <b>13-2</b> ( $\text{C}_s$ )       | <b>1832(854)</b> , <b>1879(367)</b> , 1968(307),<br>1969(181), 1986(0), 1999(230),<br>2004(50), 2015(269), 2017(563),<br>2039(2762), 2054(2391),<br>2058(2016), 2096(32) | <b>1842(813)</b> , <b>1885(364)</b> , 1973(313),<br>1976(186), 1992(0), 2005(269),<br>2011(36), 2021(184), 2024(576),<br>2044(2853), 2060(2389),<br>2065(2038), 2103(39) |
| <b>13-3</b> ( $\text{C}_2$ )       | <b>1832(751)</b> , 1942(241), 1952(69),<br>1978(147), 1982(21), 1991(318),<br>1999(1336), 2008(64), 2015(682),<br>2044(2377), 2050(1843),<br>2051(2328), 2092(1)         | <b>1841(729)</b> , 1953(159), 1963(71),<br>1982(158), 1986(39), 1997(334),<br>2003(1399), 2015(74), 2021(569),<br>2048(2506), 2056(2322),<br>2058(1872), 2099(7)         |
| <b>13-4</b> ( $\text{C}_s$ )       | <b>1767(469)</b> , <b>1880(595)</b> , 1972(24),<br>1985(43), 1989(0), 1990(392),<br>2002(264), 2018(841), 2019(565),<br>2045(2187), 2054(2370),<br>2056(2179), 2095(54)  | <b>1767(423)</b> , <b>1907(554)</b> , 1977(21),<br>1993(302), 1993(1), 1999(161),<br>2010(225), 2021(547), 2023(817),<br>2051(2279), 2058(2500),<br>2061(2183), 2102(40) |
| <b>13-5</b> ( $\text{C}_s$ )       | 1948(190), 1969(52), 1971(122),<br>1977(249), 1979(15), 1994(352),<br>1995(651), 2007(61), 2008(428),<br>2038(2257), 2046(2822),<br>2047(2456), 2092(17)                 | 1957(152), 1974(56), 1978(98),<br>1984(311), 1985(15), 2001(327),<br>2002(678), 2014(73), 2015(425),<br>2044(2300), 2052(2491),<br>2053(2777), 2099(16)                  |
| <b>13-6</b><br>( $\text{C}_{2v}$ ) | <b>1867(554)</b> , 1964(90), 1969(0),<br>1977(378), 1991(33), 2000(715),<br>2001(26), 2003(740), 2003(0),<br>2038(2063), 2042(2604),<br>2043(2960), 2089(41)             | <b>1873(538)</b> , 1969(93), 1977(0),<br>1984(419), 1997(67), 2007(648),<br>2010(29), 2010(0), 2011(731),<br>2045(2085), 2047(2677),<br>2051(2947), 2096(26)             |
| <b>13-7</b><br>( $\text{C}_{2v}$ ) | <b>1793(220)</b> , 1940(0), 1945(301),<br>1966(952), 1983(191), 1999(66),<br>2013(0), 2018(2993), 2026(1622),<br>2033(406), 2037(657),<br>2080(2801), 2110(0)            | <b>1802(222)</b> , 1946(0), 1951(319),<br>1971(988), 1988(189), 1998(100),<br>2019(0), 2024(3018), 2035(1680),<br>2039(406), 2043(598),<br>2087(2744), 2118(1)           |
| Expet <sup>e</sup>                 | 1998w, 2014m, 2018m(sh), 2052s, 2064s, 2077s                                                                                                                             |                                                                                                                                                                          |

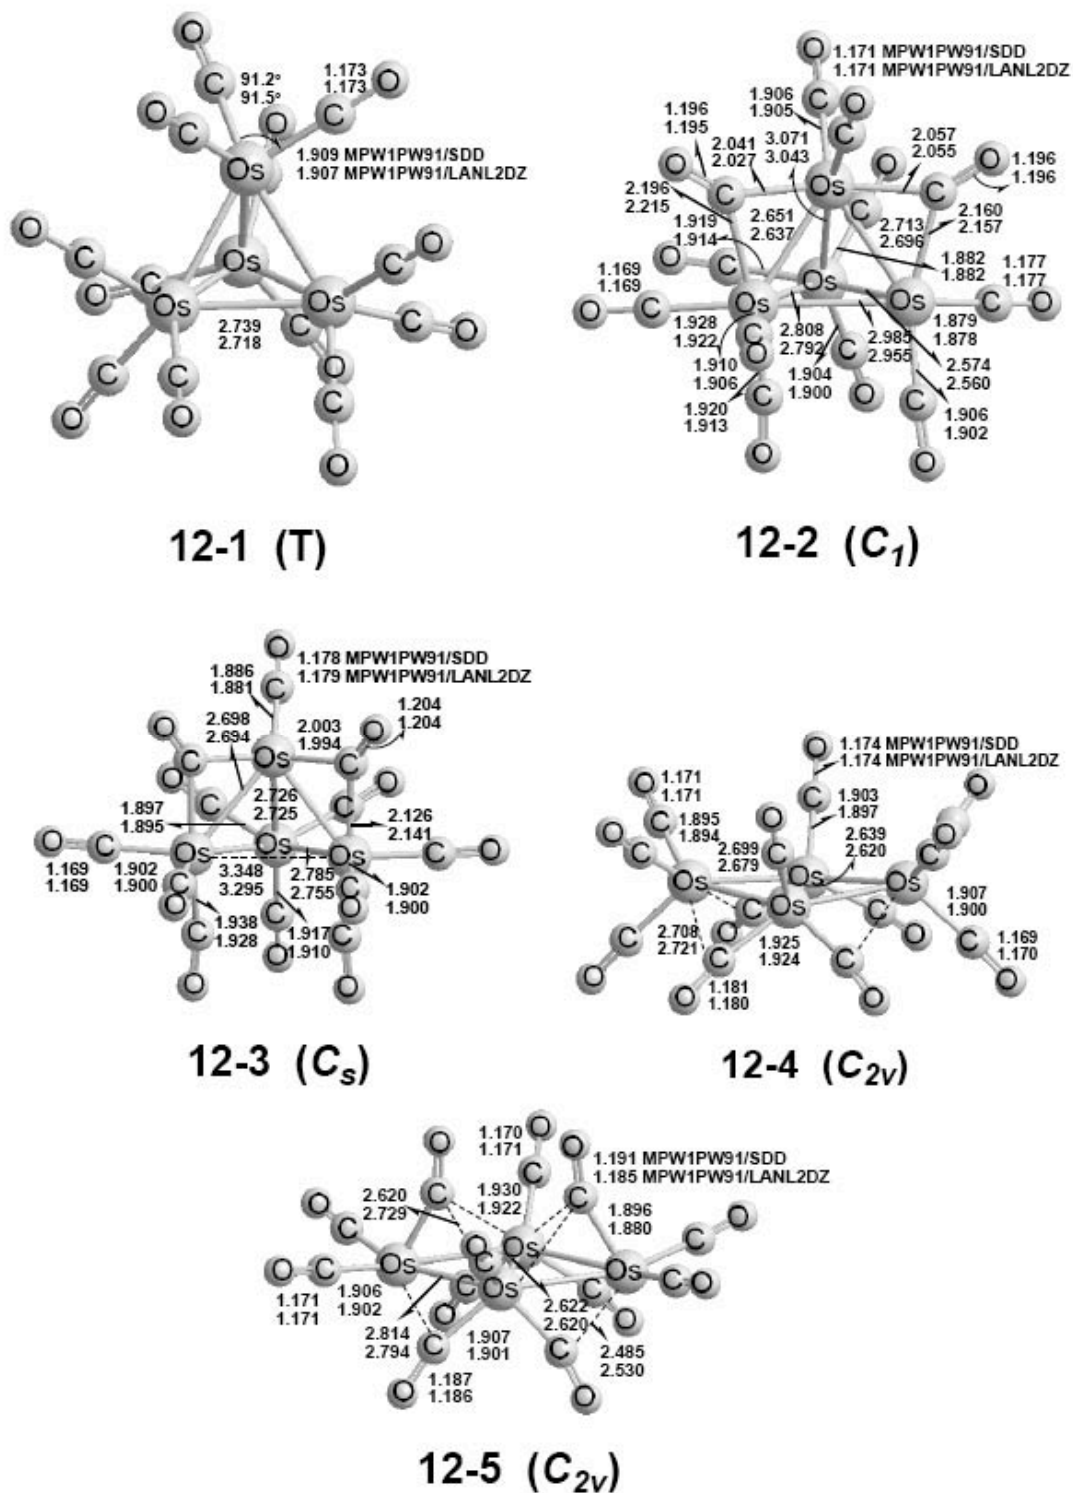

**Figure S7.** The five optimized structures found for  $\text{Os}_4(\text{CO})_{12}$ .

**Table S17.** The total energies (E, in Hartree) and relative energies ( $\Delta E$ , in kcal/mol) of  $\text{Os}_4(\text{CO})_{12}$ . The number of imaginary vibrational frequencies (Nimag) for each structure is also listed.

|                  | <b>12-1</b> ( $T$ ) | <b>12-2</b> ( $C_i$ ) | <b>12-3</b> ( $C_s$ ) | <b>12-4</b> ( $C_{2v}$ ) | <b>12-5</b> ( $C_{2v}$ ) |
|------------------|---------------------|-----------------------|-----------------------|--------------------------|--------------------------|
| MPW1PW91/SDD     |                     |                       |                       |                          |                          |
| E                | -1722.71022         | -1722.71086           | -1722.70660           | -1722.69677              | -1722.69141              |
| $\Delta E$       | 0                   | -0.4                  | 2.3                   | 8.4                      | 11.8                     |
| Nimag            | 0                   | 0                     | 0                     | 0                        | 3(43i, 29i, 21i)         |
| MPW1PW91/LANL2DZ |                     |                       |                       |                          |                          |
| E                | -1724.05171         | -1724.04774           | -1724.03979           | -1724.03699              | -1724.02382              |
| $\Delta E$       | 0                   | 2.5                   | 6.9                   | 9.2                      | 17.5                     |
| Nimag            | 0                   | 0                     | 0                     | 0                        | 1(50i)                   |

**Table S18.** The infrared  $\square(\text{CO})$  vibrational frequencies ( $\text{cm}^{-1}$ ) predicted for the  $\text{Os}_4(\text{CO})_{12}$  isomers (infrared intensities in parentheses are in  $\text{km}/\text{mol}$ , bridging  $\square(\text{CO})$  frequencies are in **bold**).

|                             | MPW1PW91/SDD                                                  |                                                                |                                                      | MPW1PW91/LANL2DZ                                              |                                                                 |                                                      |
|-----------------------------|---------------------------------------------------------------|----------------------------------------------------------------|------------------------------------------------------|---------------------------------------------------------------|-----------------------------------------------------------------|------------------------------------------------------|
| <b>12-1</b><br>( $T$ )      | 1965(124),<br>1990(654),<br>2000(0),<br>2040(2557),           | 1965(124),<br>1990(654),<br>2000(0),<br>2040(2557),            | 1965(124),<br>1990(654),<br>2040(2557),<br>2089(0)   | 1973(128),<br>1997(681),<br>2007(0),<br>2046(2595),           | 1973(128),<br>1997(681),<br>2007(0),<br>2046(2595),             | 1973(128),<br>1997(681),<br>2046(2595),<br>2096(0)   |
| <b>12-2</b><br>( $C_i$ )    | <b>1814(759)</b> ,<br>1982(73),<br>2006(431),<br>2045(2036),  | <b>1860(499)</b> ,<br>1990(176),<br>2010(515),<br>2054(2038),  | 1963(111),<br>1994(392),<br>2024(2834),<br>2090(121) | <b>1822(728)</b> ,<br>1990(28),<br>2012(410),<br>2052(2080),  | <b>1868(496)</b> ,<br>1996(163),<br>2016(497),<br>2059(2080),   | 1971(129),<br>2001(466),<br>2030(2872),<br>2096(109) |
| <b>12-3</b><br>( $C_s$ )    | <b>1770(317)</b> ,<br>1963(914),<br>2008(613),<br>2056(2338), | <b>1798(1096)</b> ,<br>1977(98),<br>2008(1201),<br>2056(2006), | 1958(7),<br>1995(53),<br>2020(835),<br>2091(183)     | <b>1775(330)</b> ,<br>1970(894),<br>2013(623),<br>2061(2376), | <b>1804(1061)</b> ,<br>1984(104),<br>2015(1331),<br>2061(2048), | 1969(2),<br>2001(29),<br>2025(733),<br>2097(190)     |
| <b>12-4</b><br>( $C_{2v}$ ) | 1937(0),<br>1949(913),<br>2005(0),<br>2020(3032),             | 1939(252),<br>1989(5),<br>2007(19),<br>2068(2737),             | 1942(469),<br>2000(444),<br>2019(1991),<br>2092(30)  | 1948(0),<br>1959(825),<br>2010(0),<br>2028(3050),             | 1951(243),<br>1995(36),<br>2010(22),<br>2072(2734),             | 1954(456),<br>2007(697),<br>2024(1842),<br>2097(29)  |
| <b>12-5</b><br>( $C_{2v}$ ) | <b>1875(13)</b> ,<br>1910(262),<br>1997(749),<br>2024(2582),  | <b>1899(0)</b> ,<br>1912(200),<br>1999(0),<br>2042(3847),      | 1899(141),<br>1926(2087),<br>2016(192),<br>2073(117) | <b>1913(61)</b> ,<br>1924(206),<br>2001(677),<br>2028(2691),  | <b>1914(0)</b> ,<br>1936(992),<br>2004(0),<br>2047(3904),       | 1920(100),<br>1955(1298),<br>2020(215),<br>2080(135) |
